# Supplementary material
Source: publisher site journal article supplement (https://www.dovepress.com/get_supplementary_file.php?f=180520T3.xlsx)
Supplement: Supplementary file 1 [file get_supplementary_file.php]

## Sheet: Table S3
	SKOV3-NT		SKOV3-SI1		SKOV3-SI2				433-MOCK		433-NT		433-Pim1
Pim1	0.00179	0.00115	0.000434	0.000452	0.000239	0.000426		Pim1	0.00274	0.00303	0.0055	0.00764	6.805	8.954
LDHA	0.5733	0.5631	0.3287	0.364	0.3929	0.3966		LDHA	0.3283	0.4255	0.3701	0.4324	0.5633	0.6047
LDHB	1.532	1.366	1.519	1.476	0.8527	0.8659		LDHB	0.8296	0.9563	0.7161	1.043	0.8327	0.9471
PKM1	0.00524	0.0119	0.00584	0.00579	0.00653	0.00541		PKM1	0.00632	0.00733	0.00742	0.0124	0.015	0.00419
PKM2	0.1243	0.0985	0.0676	0.089	0.0825	0.0732		PKM2	0.2067	0.2327	0.2226	0.1897	0.3828	0.4098
TXNIP	0.0087	0.0108	0.00968	0.00919	0.0131	0.0082		TXNIP	0.00317	0.00407	0.00507	0.00318	0.0062	0.0029
IDH1	0.0351	0.0396	0.0278	0.0218	0.0289	0.0283		IDH1	0.379	0.3555	0.3642	0.4295	0.6806	0.7608
ME1	0.00893	0.00574	0.00918	0.00831	0.0116	0.0163		ME1	0.225	0.3183	0.2329	0.2224	0.2124	0.2344
MTHFD2	0.0472	0.0343	0.0288	0.0356	0.0257	0.0269		MTHFD2	0.0429	0.0677	0.0464	0.0547	0.0815	0.0641
NQO1	0.0792	0.0789	0.0637	0.0467	0.0631	0.0604		NQO1	0.6357	0.9641	0.646	0.7764	0.5913	0.862
HIF1a	0.1267	0.0782	0.1321	0.0902	0.0941	0.0891		HIF1a	0.1452	0.1837	0.1785	0.2029	0.1371	0.1443
PGD	0.00956	0.00719	0.0116	0.00634	0.00998	0.00852		PGD	0.1168	0.1853	0.1495	0.0539	0.0744	0.1246
PPAT	0.0115	0.0127	0.0114	0.00709	0.00986	0.00779		PPAT	0.0162	0.0175	0.0177	0.0183	0.0156	0.0185
TALDO1	0.1014	0.0936	0.0796	0.0544	0.0633	0.0539		TALDO1	0.1563	0.3253	0.1527	0.1736	0.1279	0.1503
TKT	0.0979	0.0699	0.059	0.0392	0.0576	0.0424		TKT	0.2325	0.2965	0.2314	0.2027	0.3951	0.4295
GLUD1	0.0351	0.0293	0.0353	0.038	0.0239	0.0273		GLUD1	0.091	0.0694	0.1766	0.1116	0.0529	0.087
GOT1	0.00234	0.0017	0.00197	0.0022	0.00196	0.00196		GOT1	0.00165	0.000991	0.00295	0.0035	0.00113	0.00116
GPT2	0.000538	0.000724	0.000967	0.00159	0.00121	0.00139		GPT2	0.00103	0.00059	0.0024	0.00141	0	0.00367
PSAT1	0.053	0.0346	0.055	0.0567	0.0456	0.0418		PSAT1	0.00358	0.00715	0.0126	0.0159	0.00783	0.00489
GLUT1	0.00997	0.00876	0.00516	0.00498	0.00438	0.00325		GLUT1	0.2726	0.237	0.1327	0.2327	0.351	0.3589
HK2	0.000582	0.000445	0.000382	0.000841	0.000587	0.000921		HK2	0.00426	0.00288	0.00254	0.00419	0.00286	0.00203
GLUT4	2.35e-05	0.00031	4.17e-05	6.15e-05	4.79e-05	5.53e-05		GLUT4	0.000799	0.000404	0.000124	0.000299	0.000154	0.000272
G6P	0.0304	0.0216	0.0216	0.0323	0.0224	0.0256		G6P	0.1208	0.1196	0.0623	0.1029	0.067	0.0672
PFKM	0.000114	0.000111	6.02e-05	0.000174	0.000102	0.000101		PFKM	0.00137	0.00105	0.000192	0.000468	0.000369	0.000326
PFKL	0.00199	0.00324	0.00198	0.00306	0.00326	0.00344		PFKL	0.1003	0.1201	0.0455	0.0694	0.0632	0.0775
PFKP	0.00593	0.00527	0.00458	0.0117	0.0101	0.0109		PFKP	0.3439	0.1957	0.1471	0.2067	0.1694	0.2364
ALDOA	0.2017	0.1549	0.1466	0.1996	0.1239	0.1958		ALDOA	0.2297	0.1556	0.165	0.21	0.2221	0.2013
ALDOB	0.000164	0.000152	0.000102	0.000316	0.000108	0.000217		ALDOB	0.015	0.0106	0.00911	0.00845	0.0108	0.0106
PGK1	0.2503	0.2776	0.1209	0.1331	0.118	0.1307		PGK1	1.258	1.002	0.9056	1.101	2.943	2.976
PGAM1	0.0715	0.0781	0.0164	0.0327	0.054	0.0518		PGAM1	1.181	1.235	1.078	1.261	2.001	1.284
ENO1	0.4266	0.2532	0.1885	0.3058	0.2111	0.2808		ENO1	1.056	1.801	1.035	1.278	2.047	1.717
ENO2	0.00294	0.00246	0.0018	0.00296	0.00267	0.00271		ENO2	0.00364	0.00708	0.00168	0.00168	0.00183	0.00178
